# Supplementary material for: A High-Throughput Method as a Diagnostic Tool for HIV Detection in Patient-Specific Induced Pluripotent Stem Cells Generated by Different Reprogramming Methods
Source: Hindawi journal article supplement (doi:10.1155/2019/2181437), 2019-08-05
Supplement: f1 [file 2181437.f1.pdf]

## **Supplemental material:**

### **A high throughput method as diagnostic tool for HIV detection in patient-specific induced pluripotent stem cells generated by different reprogramming methods**

#### **1. Materials and Methods:**

##### **1.1 Teratoma formation**

To investigate the developmental potential of reprogrammed clones *in vivo*, hiPSCs (about  $2 \times 10^6$  cells for each mouse) were injected subcutaneously into 8-week-old SCID mice as described previously <sup>1</sup>. Six to eight weeks after injection the mice were sacrificed and the resulting teratomas were examined after hematoxylin and eosin staining for the presence of derivatives of the three germ layers.

##### **1.2 Alkaline Phosphatase (ALP) staining**

Activity of Alkaline Phosphatase (ALP) in hiPSC-colonies was detected using the ALP Staining Kit from SIGMA according to manufacturer's protocol. Therefore hiPSC-colonies (6-cm dishes at 60% confluence) were fixed stained and analyzed by light microscopy.

##### **1.3 Embroid body (EB) formation**

For Analyzing the spontaneous differentiation capacity of the hiPSCs an embroid body (EB) formation was initialized. Therefor iPSCs were cultivated on mouse embryonic fibroblasts in hES-medium (DMEM/F12, 1% NEAA, 1%  $\beta$ -mercaptoethanol, 15% knockout serum). When the hiPSCs reach a confluency of 90-100% cells were treated for 4 min with collagenase IV (200 U/mL) at 37°C and scrapped into big clusters. The clusters were gently resuspended in hES-medium with a glas pipette and transferred to an uncoated 6cm dish so that EBs formation could occure in suspension. After 24 h medium was changed to Iscove-Differentiation Medium (Iscove medium, 20% fetal calf serum, 1% NEAA, monothioglycerol (450  $\mu$ mol/L)). After 8 days of cultivation, accrued EBs were collected and either used for RNA samples or for immunocytochemical staining (plated onto Geltrex coated plates and coverslips). EBs were analysed at day 8, 8+8 and 8+25.

#### **1.4 Reverse transcriptase-polymerase chain reaction (RT-PCR)**

For total RNA isolation the SV Total RNA Isolation System with on-column DNase digestion (Promega) was used. The first-strand cDNA synthesis was carried out with DNase-treated RNA (200 ng) by using Murine Leukaemia Virus Reverse Transcriptase and Oligo d(T)<sub>16</sub> (Applied Biosystems). One-tenth of the cDNA reaction was taken as PCR template and amplified for 25-35 cycles depending on the relative mRNA quantity with denaturation at 94 °C for 15 s, annealing at 51 °C to 66 °C for 15 s according to the primers, and elongation at 72 °C for 30 s. The forward and reverse primer sequences, the annealing temperatures and the number of cycles being performed for RT-PCR analyses were listed in Supplemental Table 1. GAPDH was used as an internal control.

#### **1.5 Immunocytochemical staining**

Cultures at different stages were fixed with 4% paraformaldehyde (PFA, Sigma) in phosphate-buffered saline (PBS) for 20 min at room temperature and afterwards blocked with 1% BSA at 4 °C overnight. The primary antibodies were disposed for 1 h at 37 °C or overnight at 4 °C containing 0.1% Triton X-100 (Sigma) in PBS for permeabilization (when antibodies against nuclear proteins as OCT4, SOX2 and NANOG are used). The fluorescently labeled secondary antibodies showed minimal cross reactivity and were applied in 1% BSA for 1 h at 37 °C. Nuclei were counter-stained with 4,6-diamino-2-phenylindole (DAPI, 0.2 ng/mL, Sigma) for 10 min at room temperature. For mounting the samples VectaShield mounting medium (VECTOR Laboratories) was used. Details regarding the appropriated antibodies are listed in Supplemental Table 2.

Images were evaluated using a fluorescence microscope (Axiovert 200, Zeiss). Detection of the FITC fluorophore was carried out by using the filter sets with excitation BP 475/40, beam splitter FT 500 and emission BP 530/50. Detection of the Cy3 fluorophore was done by using the filter sets with excitation BP 540/25, beam splitter FT 565 and emission BP 605/55. The filter sets with excitation G 365, beam splitter FT 395 and emission BP 445/50 was performed for the detection of the DAPI fluorophore.

#### **1.6 Statistical analysis**

Data were given as the mean±SEM (standard error of the mean). One way-ANOVA was used for comparison of more than two groups and multiple comparisons. A value of *p* less than 0.05 was considered statistically significant. \* =  $p \leq 0.05$ , \*\* =  $p \leq 0.01$ ; \*\*\* =  $p \leq 0.001$ . Statistical

1 analysis was done with GraphPad prism 6 or 7. N-numbers are defined for each experiment in  
2 the figure legend.

3

4 **References:**

5 1. Guan K, Nayernia K, Maier LS, et al. Pluripotency of spermatogonial stem cells from adult  
6 mouse testis. Nature. 2006;440:1199-1203.

7

8

9

**Supplemental Table 1:** Primers used in RT-PCR

| Gene name    | Product size (bp) | Forward primer sequence               | Reverse primer sequence                    | Annealing temperature | Cycle |
|--------------|-------------------|---------------------------------------|--------------------------------------------|-----------------------|-------|
| <i>GAPDH</i> | 258               | AGA GGC AGG GAT GAT GTT CT            | TCT GCT GAT GCC CCC ATG TT                 | 55 °C                 | 34    |
| <i>OCT4</i>  | 218               | GAC AAC AAT GAA AAT CTT CAG<br>GAG A  | TTCTGGCGCCGGTTACAGAACCA                    | 58 °C                 | 36    |
| <i>LIN28</i> | 410               | AGT AAG CTG CAC ATG GAA GG            | ATT GTG GCT CAA TTC TGT GC                 | 52 °C                 | 38    |
| <i>SOX2</i>  | 437               | ATG CAC CGC TAC GAC GTG A             | CTT TTG CAC CCC TCC CAT TT                 | 56 °C                 | 43    |
| <i>GDF3</i>  | 311               | TTC GCT TTC TCC CAG ACC AAG<br>GTT TC | TAC ATC CAG CAG GTT GAA GTG<br>AAC AGC ACC | 54 °C                 | 32    |
| <i>FOXD3</i> | 353               | GTG AAG CCG CCT TAC TCG<br>TAC        | CCG AAG CTC TGC ATC ATG AG                 | 61 °C                 | 38    |

**Supplemental Table 2:** Antibodies used in Immunocytochemistry

| Primary antibody | Type                   | Dilution | Supplier                         |
|------------------|------------------------|----------|----------------------------------|
| hOCT4            | Polyclonal goat IgG    | 1:40     | R&D, Minneapolis, Minnesota, USA |
| hSOX2            | monoclonal mouse IgG2A | 1:50     | R&D, Minneapolis, Minnesota, USA |
| hLIN28           | Polyclonal goat IgG    | 1:300    | R&D, Minneapolis, Minnesota, USA |

|                                  |                               |                 |                                                        |
|----------------------------------|-------------------------------|-----------------|--------------------------------------------------------|
| hTRA1-60                         | Monoclonal mouse IgM          | 1:200           | Abcam, Cambridge, United Kingdom                       |
| hAFP                             | Polyclonal rabbit IgG         | 1:100           | Dako, Hamburg, Germany                                 |
| h $\alpha$ -SMA                  | Monoclonal mouse IgG2A        | 1:3000          | Sigma Aldrich, St. Louis, Missouri, USA                |
| $\beta$ -III-tubulin             | mouse IgG2A                   | 1:1000          | BioLegend, San Diego, California, USA                  |
| <b>Secondary antibody</b>        | <b>Type</b>                   | <b>Dilution</b> | <b>Supplier</b>                                        |
| Alexa Fluor 647 $\alpha$ -rabbit | Donkey- $\alpha$ -rabbit IgG  | 1:1000          | Thermo Fisher Scientific, Waltham, Massachusetts, USA  |
| Alexa Fluor 555 $\alpha$ -goat   | Donkey- $\alpha$ -goat IgG    | 1:1000          | Thermo Fisher Scientific, Waltham, Massachusetts, USA  |
| Alexa Fluor 488 $\alpha$ -mouse  | Donkey- $\alpha$ -mouse IgG   | 1:1000          | Thermo Fisher Scientific, Waltham, Massachusetts, USA  |
| Alexa Fluor 488 $\alpha$ -mouse  | Goat- $\alpha$ -mouse IgG+IgM | 1:500           | Thermo Fisher Scientific, Waltham, Massachusetts, USA  |
| Cyanine Cy3 $\alpha$ -mouse      | Goat- $\alpha$ -mouse IgG+IgM | 1:300           | Jackson Immuno Research, West Grove, Pennsylvania, USA |

**Supplemental Table 3** Summary of generated ps-iPSC lines from fibroblasts and PBMCs

| <b>Cell sources</b>     | <b>Reprogramming system</b> | <b>Number of donors analyzed</b> | <b>Number of donors with iPSCs generated</b> |
|-------------------------|-----------------------------|----------------------------------|----------------------------------------------|
| <b>Fibroblasts (FB)</b> | plasmids                    | 18                               | 16 (89%)                                     |
|                         | Sendai virus                | 25                               | 25 (100%)                                    |
|                         | STEMCCA                     | 5                                | 5 (100%)                                     |
| <b>PBMCs</b>            | plasmids                    | 5                                | 0 (0%)                                       |
|                         | Sendai virus                | 6                                | 6 (100%)                                     |
|                         | STEMCCA                     | n. a.                            | n. a.                                        |
| <b>MSCs</b>             | plasmids                    | 4                                | 4 (100%)                                     |
|                         | Sendai virus                | 4                                | 4 (100%)                                     |
|                         | STEMCCA                     | n. a.                            | n. a.                                        |
